# Supplementary material
Source: MDPI journal article supplement (https://www.mdpi.com/2073-4352/13/5/738)
Supplement: s1 [file s1 › crystals-2334489-supplementary.pdf]

Dear editor "Crystals" journal

27-4-2023

I am pleased to resubmit my revised paper proof numbered "2334489" to the journal crystals in the special issue

"Synthesis and Characterization of Coordination Compounds" for publication

The paper is entitled:

Structures, characterization and DFT studies of four novel Nickel phenanthroline complexes.

We did revise the proof and uploaded now.

Thanks you a lot for your cooperation

Prof Hassan Hammud

Chemistry department

King Faisal University

hhammoud@kfu.edu.sa
